# Supplementary material for: A survey of indicator parameters to monitor regrowth in unchlorinated drinking water
Source: Royal Society of Chemistry journal article supplement (doi:10.1039/c6ew00007j), 2016-01-01
Supplement: c6ew00007j1.pdf [file c6ew00007j1.pdf]

## Electronic Supplementary Information

**Table S1** Gene copy numbers of *Mycobacterium* spp. and fungi (from high to low numbers) in the treated water of 28 treatment plants in the Netherlands that produce unchlorinated drinking water from groundwater and their relation to the amount of regrowth (low, medium and high) in the distribution system as has been determined by van der Wielen & van der Kooij <sup>44</sup>.

| Plant | <i>Mycobacterium</i><br>(gc l <sup>-1</sup> ) | Regrowth<br>Rank* | Plant | Fungi (gc l <sup>-1</sup> ) | Regrowth<br>Rank* |
|-------|-----------------------------------------------|-------------------|-------|-----------------------------|-------------------|
| 19    | $1.4 \times 10^6$                             | Medium            | 26    | $1.5 \times 10^6$           | Low               |
| 14    | $1.1 \times 10^6$                             | Medium            | 14    | $7.2 \times 10^5$           | Medium            |
| 2     | $5.8 \times 10^5$                             | Medium            | 16    | $6.9 \times 10^5$           | Medium            |
| 23    | $3.7 \times 10^5$                             | Low               | 15    | $4.8 \times 10^5$           | Low               |
| 22    | $3.2 \times 10^5$                             | Medium            | 3     | $3.0 \times 10^5$           | Medium            |
| 6     | $3.1 \times 10^5$                             | Low               | 18    | $1.7 \times 10^5$           | Low               |
| 3     | $3.0 \times 10^5$                             | Medium            | 19    | $1.6 \times 10^5$           | Medium            |
| 1     | $2.3 \times 10^5$                             | Low               | 27    | $1.6 \times 10^5$           | Low               |
| 25    | $2.2 \times 10^5$                             | High              | 23    | $1.4 \times 10^5$           | Low               |
| 21    | $2.0 \times 10^5$                             | Medium            | 11    | $1.3 \times 10^5$           | Low               |
| 5     | $1.9 \times 10^5$                             | Low               | 6     | $1.1 \times 10^5$           | Low               |
| 8     | $1.8 \times 10^5$                             | Low               | 22    | $1.0 \times 10^5$           | Medium            |
| 13    | $1.8 \times 10^5$                             | Low               | 20    | $9.0 \times 10^4$           | Low               |
| 11    | $1.7 \times 10^5$                             | Low               | 9     | $8.5 \times 10^4$           | Low               |
| 28    | $1.7 \times 10^5$                             | Low               | 13    | $7.7 \times 10^4$           | Low               |
| 18    | $1.5 \times 10^5$                             | Low               | 4     | $7.0 \times 10^4$           | Low               |
| 27    | $1.4 \times 10^5$                             | Low               | 1     | $6.5 \times 10^4$           | Low               |
| 20    | $1.2 \times 10^5$                             | Low               | 21    | $6.3 \times 10^4$           | Medium            |
| 24    | $1.1 \times 10^5$                             | Low               | 2     | $6.2 \times 10^4$           | Medium            |
| 12    | $1.0 \times 10^5$                             | Medium            | 17    | $5.1 \times 10^4$           | Medium            |
| 9     | $7.1 \times 10^4$                             | Low               | 28    | $4.8 \times 10^4$           | Low               |
| 26    | $6.1 \times 10^4$                             | Low               | 25    | $6.4 \times 10^4$           | High              |
| 16    | $5.5 \times 10^4$                             | Medium            | 8     | $5.6 \times 10^4$           | Low               |
| 15    | $5.0 \times 10^4$                             | Low               | 12    | $5.0 \times 10^4$           | Medium            |
| 4     | $4.9 \times 10^4$                             | Low               | 24    | $4.2 \times 10^4$           | Low               |
| 17    | $4.7 \times 10^4$                             | Medium            | 5     | $4.0 \times 10^4$           | Low               |

\* Rank regrowth was based on the average *Aeromonas* plate counts and HPC in the distribution system over a three year period and were taken from van der Wielen & van der Kooij <sup>44</sup>.

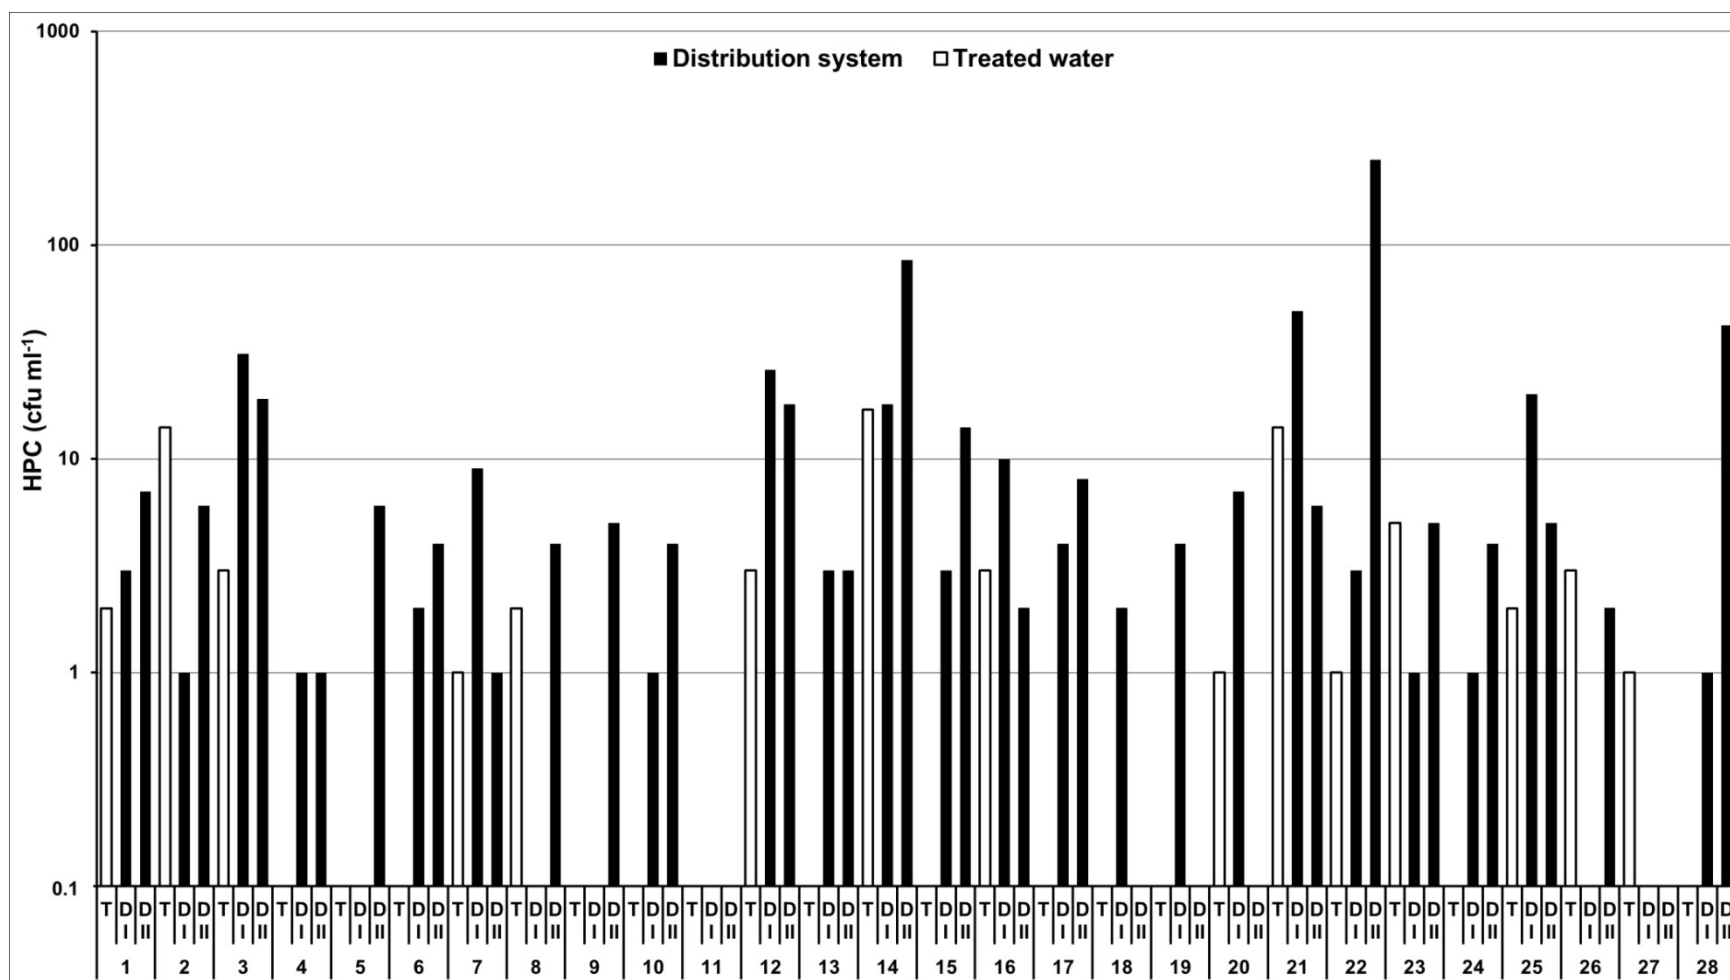

**Figure S1** Heterotrophic plate counts (HPC) in treated water and in drinking water samples at two locations in the distribution system of 28 treatment plants in the Netherlands that produce unchlorinated drinking water from groundwater. T, treated water; DI, water from location I in distribution system; DII, water from location II in distribution system.

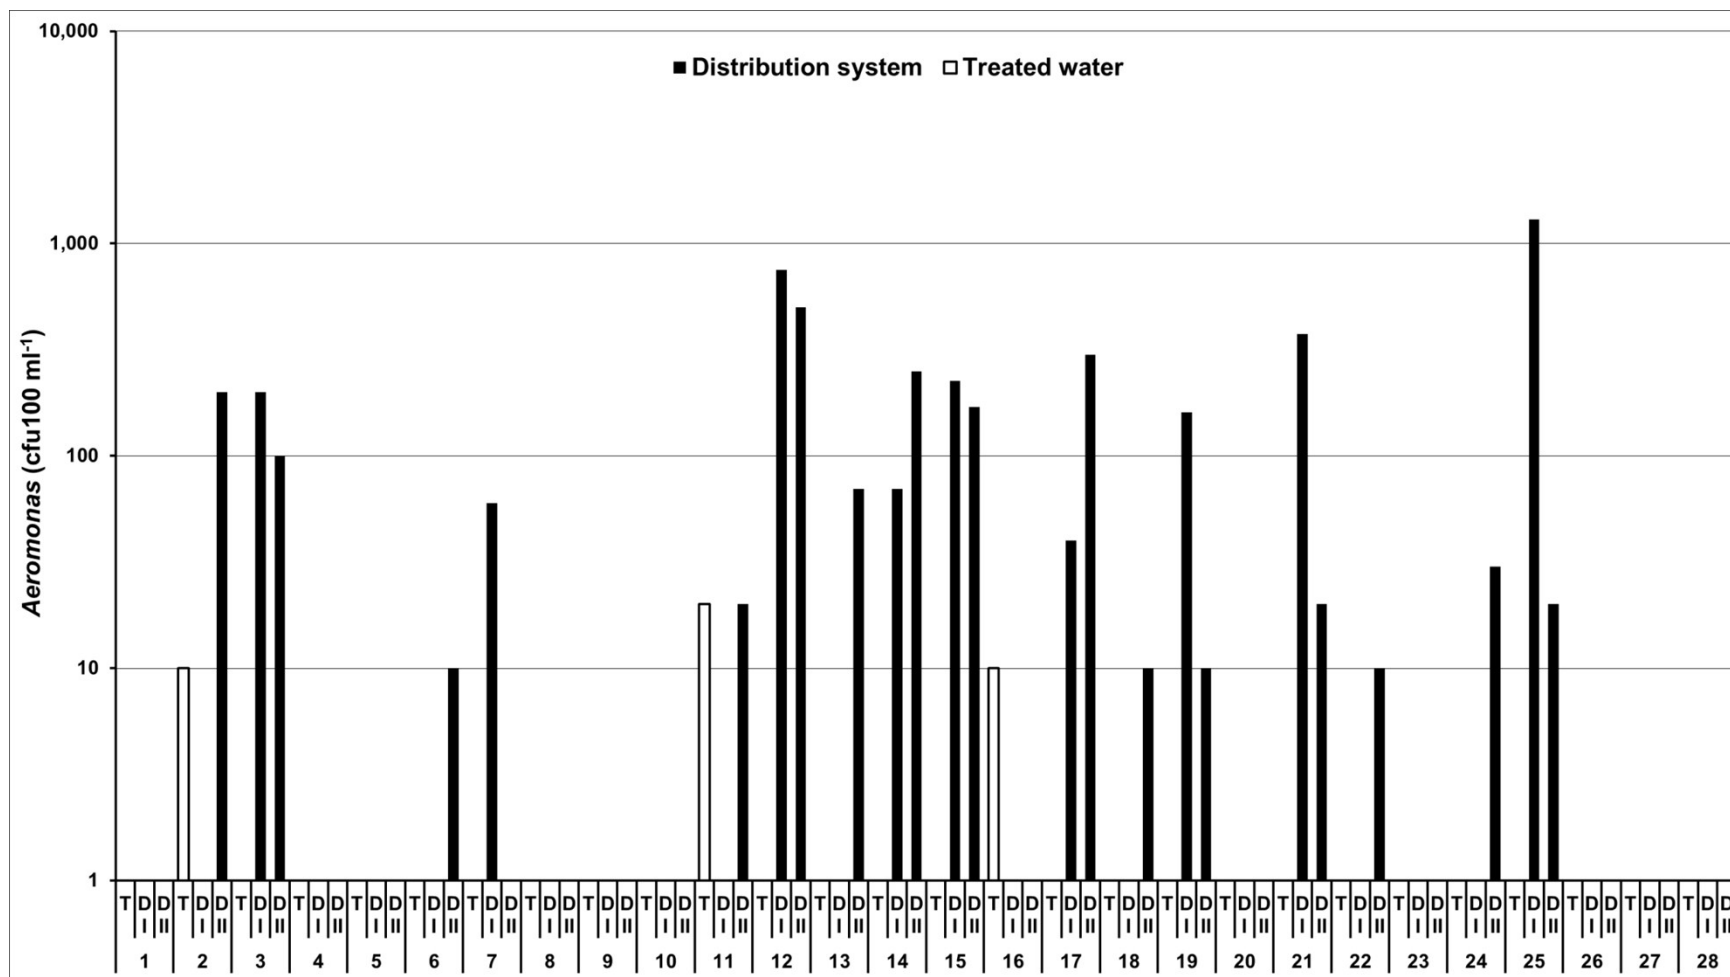

**Figure S2** *Aeromonas* plate counts in treated water and in drinking water samples at two locations in the distribution system of 28 treatment plants in the Netherlands that produce unchlorinated drinking water from groundwater.

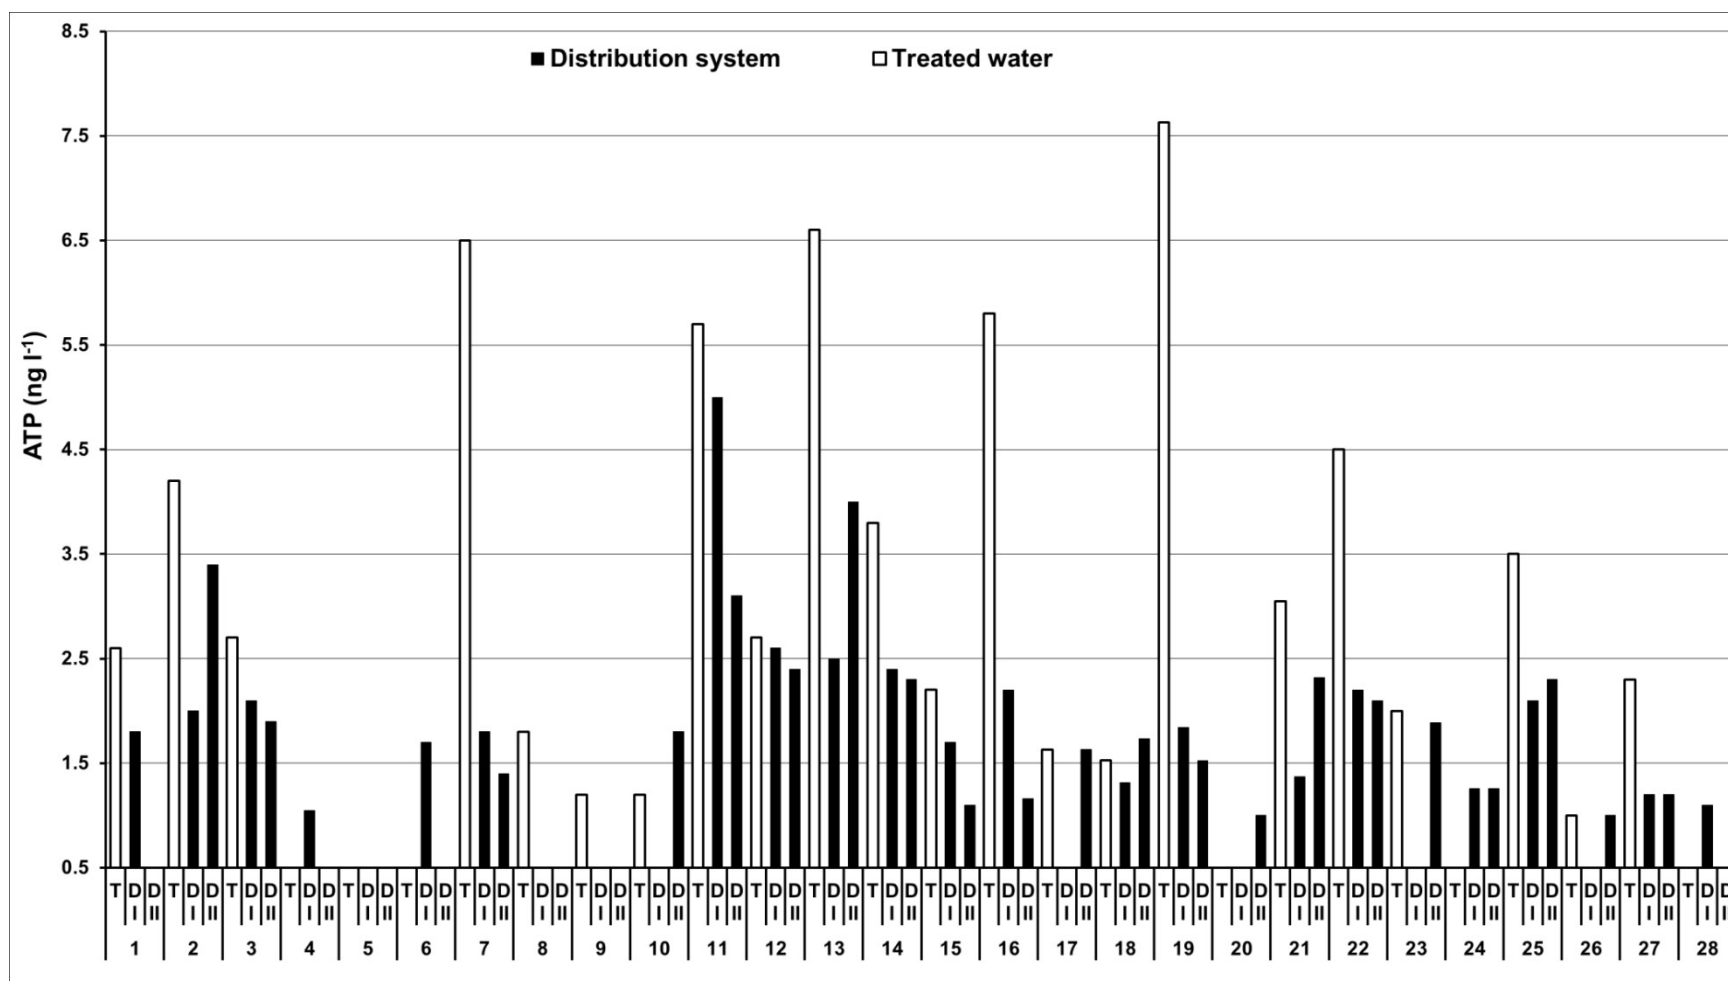

**Figure S3** ATP concentrations in treated water and in drinking water samples at two locations in the distribution system of 28 treatment plants in the Netherlands that produce unchlorinated drinking water from groundwater. T, treated water; DI, water from location I in distribution system; DII, water from location II in distribution system.

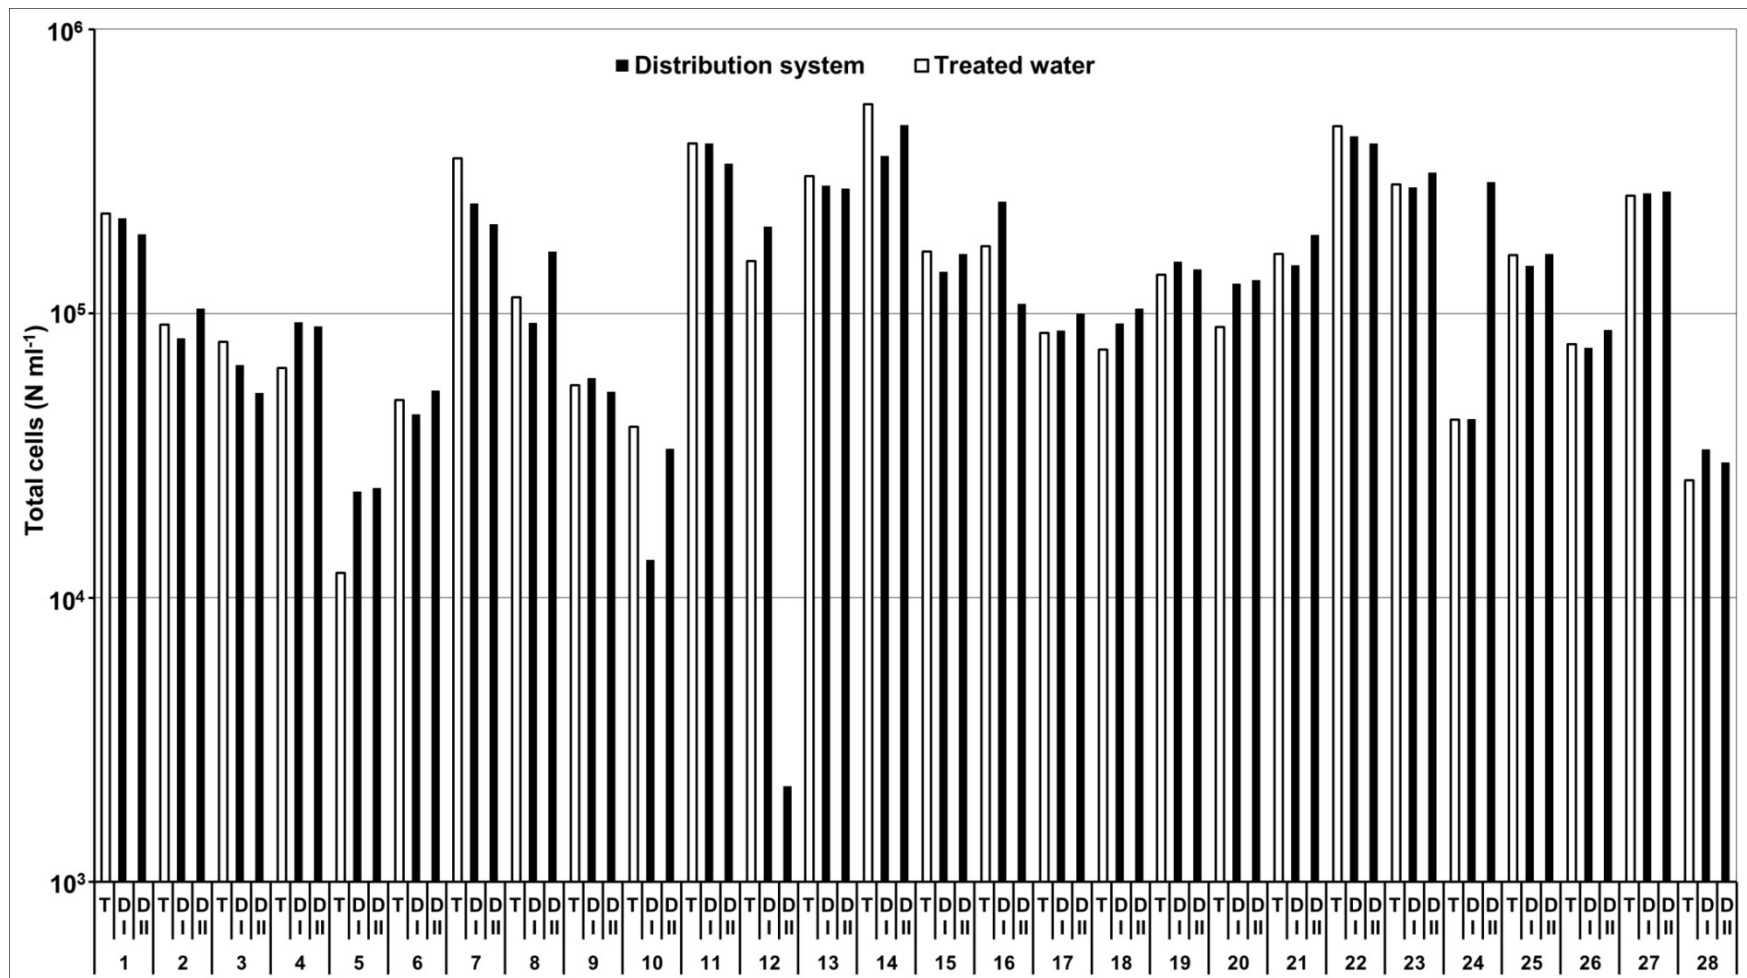

**Figure S4** Total cell counts enumerated with a flow cytometer in treated water and in drinking water samples at two locations in the distribution system of 28 treatment plants in the Netherlands that produce unchlorinated drinking water from groundwater. T, treated water; DI, water from location I in distribution system; DII, water from location II in distribution system.

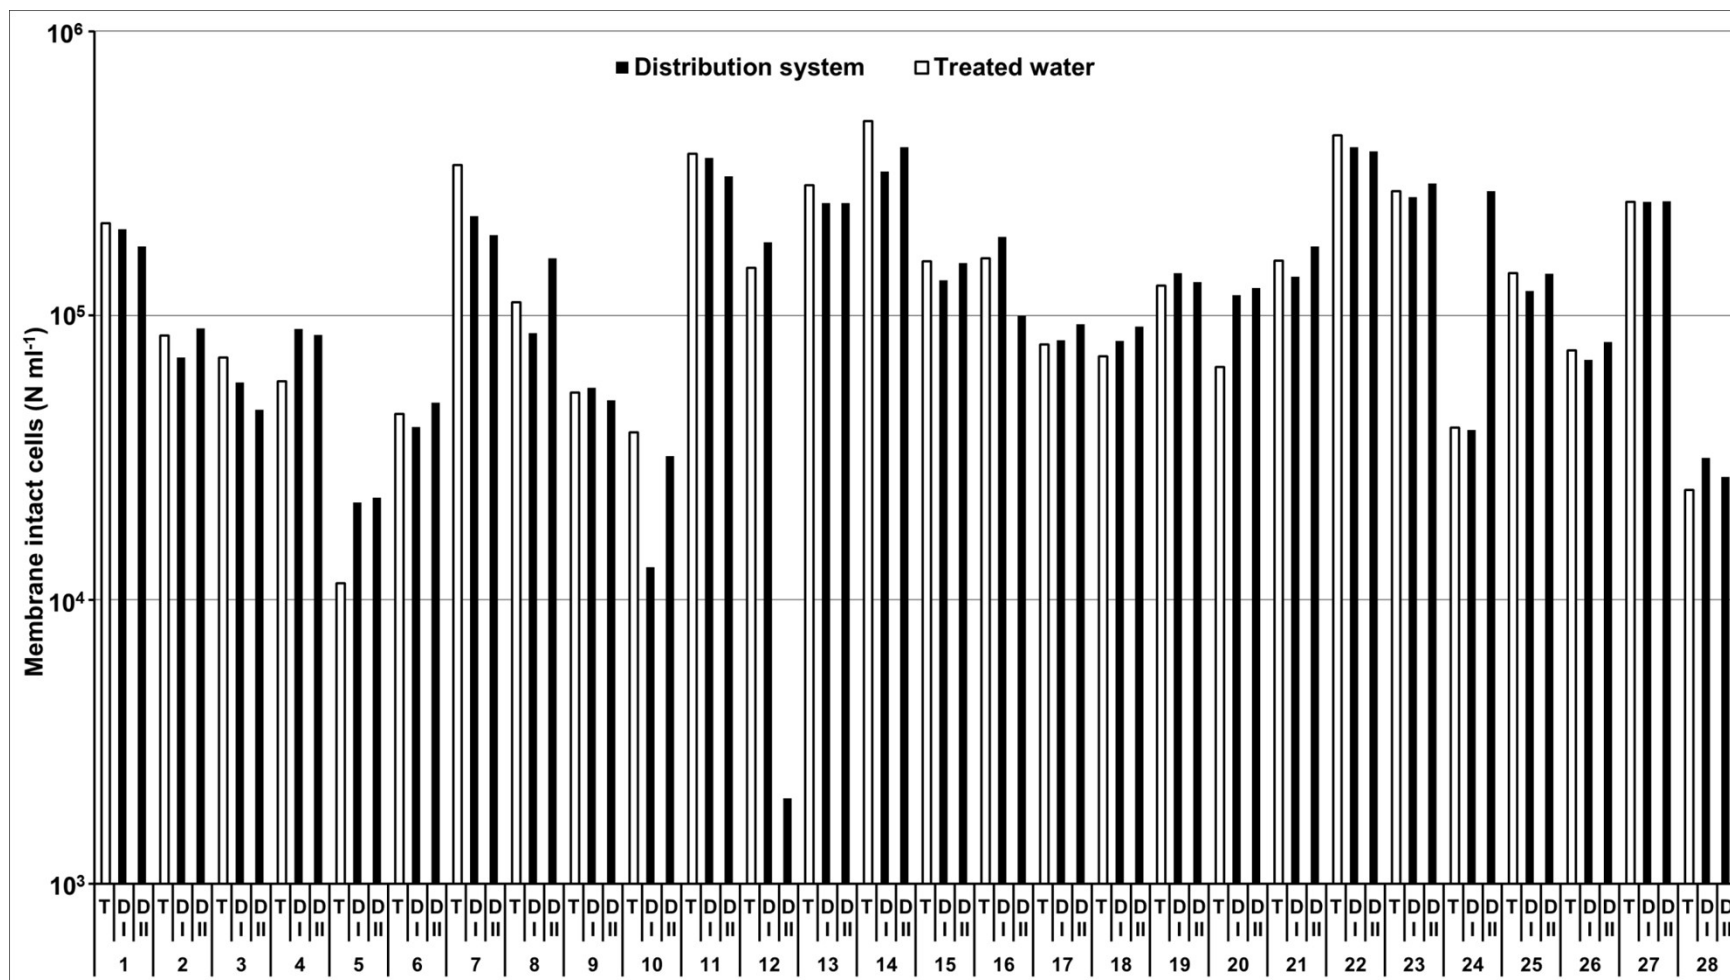

**Figure S5** Membrane intact cell numbers enumerated with a flow cytometer in treated water and in drinking water samples at two locations in the distribution system of 28 treatment plants in the Netherlands that produce unchlorinated drinking water from groundwater.

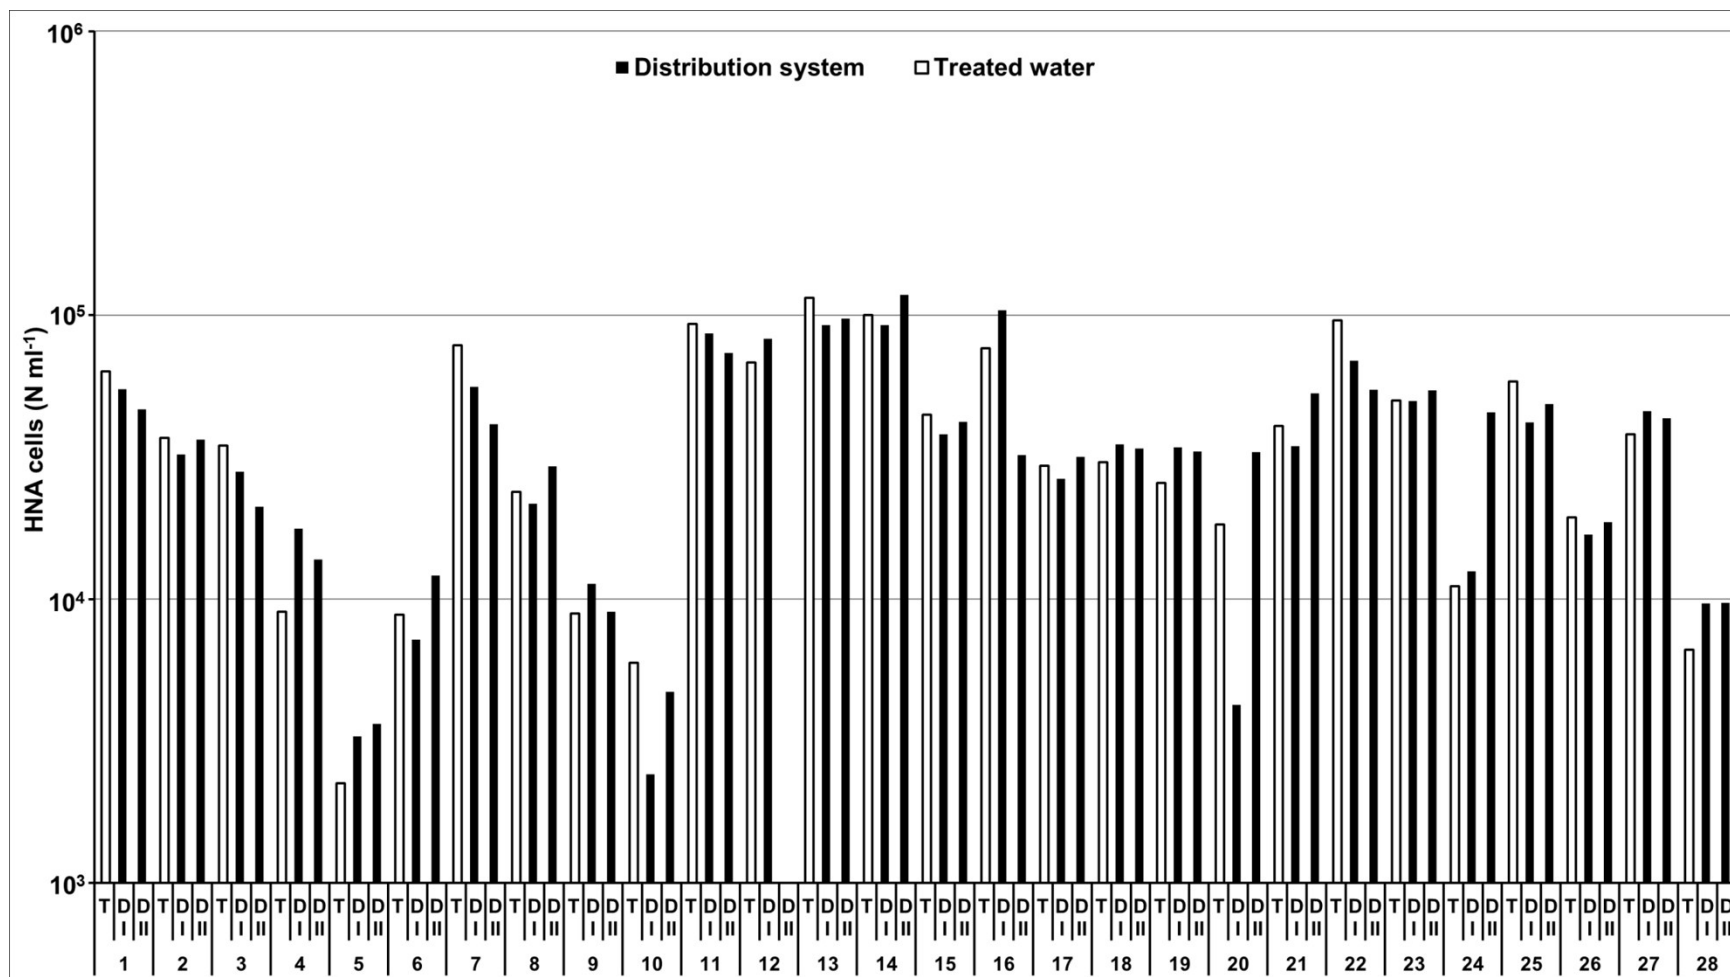

**Figure S6** High nucleic acid (HNA) cell numbers enumerated with a flow cytometer in treated water and in drinking water samples at two locations in the distribution system of 28 treatment plants in the Netherlands that produce unchlorinated drinking water from groundwater.

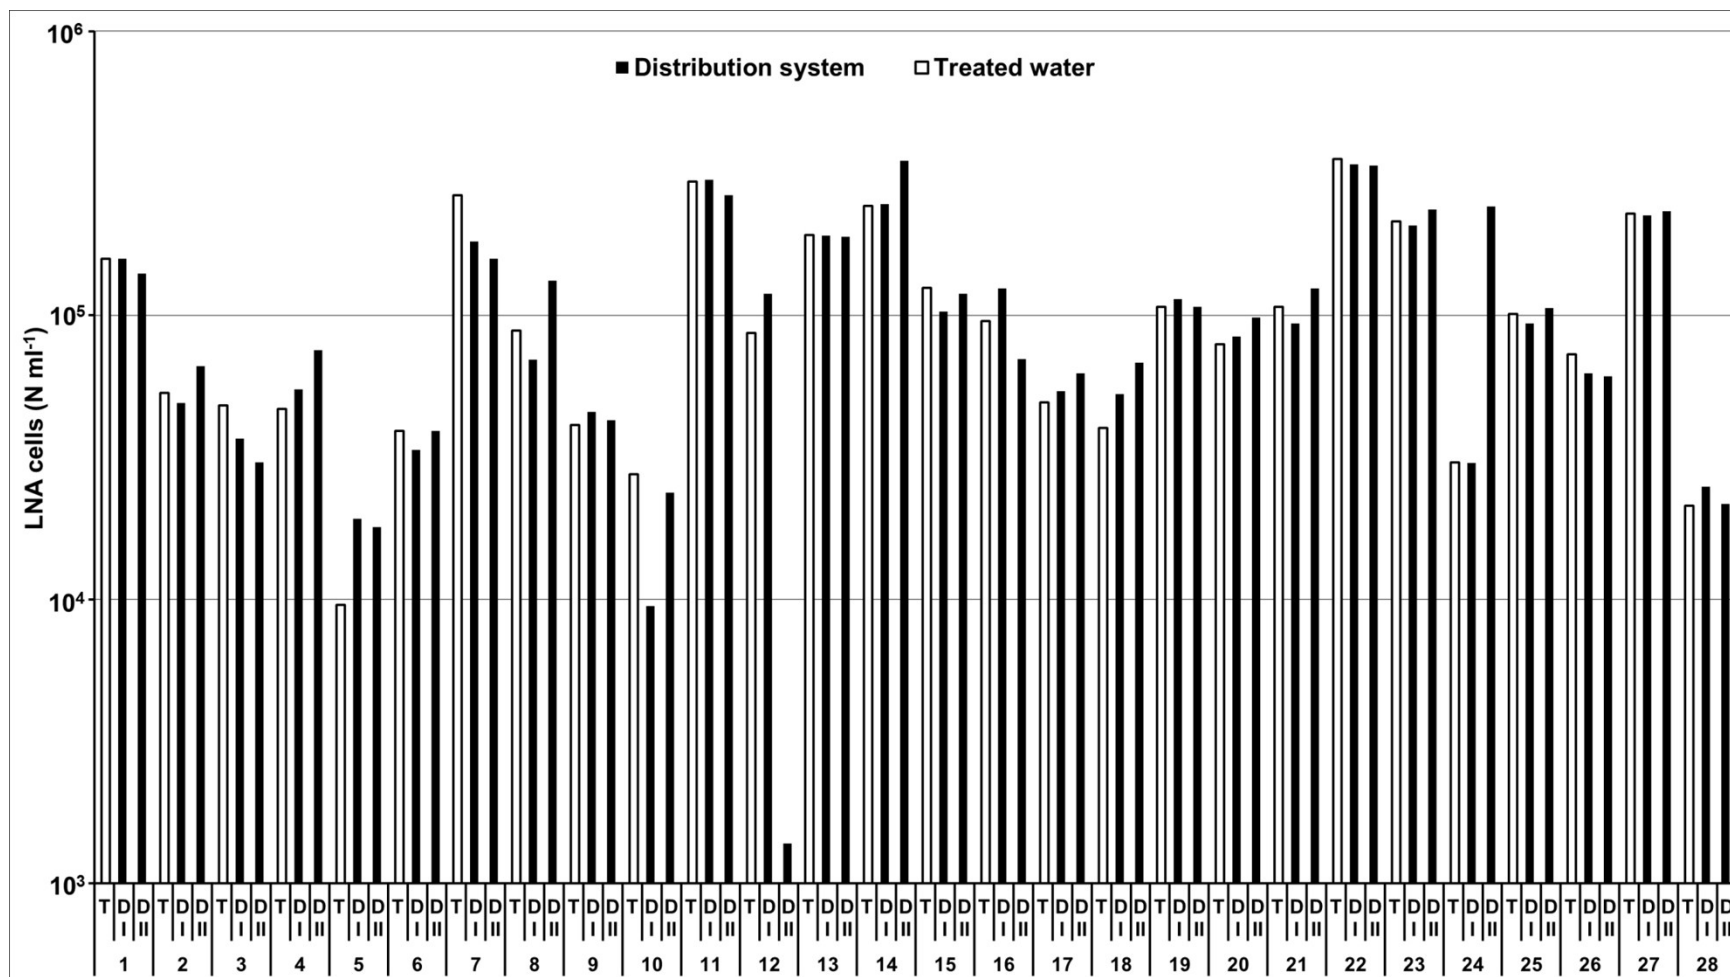

**Figure S7** Low nucleic acid (LNA) cell numbers enumerated with a flow cytometer in treated water and in drinking water samples at two locations in the distribution system of 28 treatment plants in the Netherlands that produce unchlorinated drinking water from groundwater.



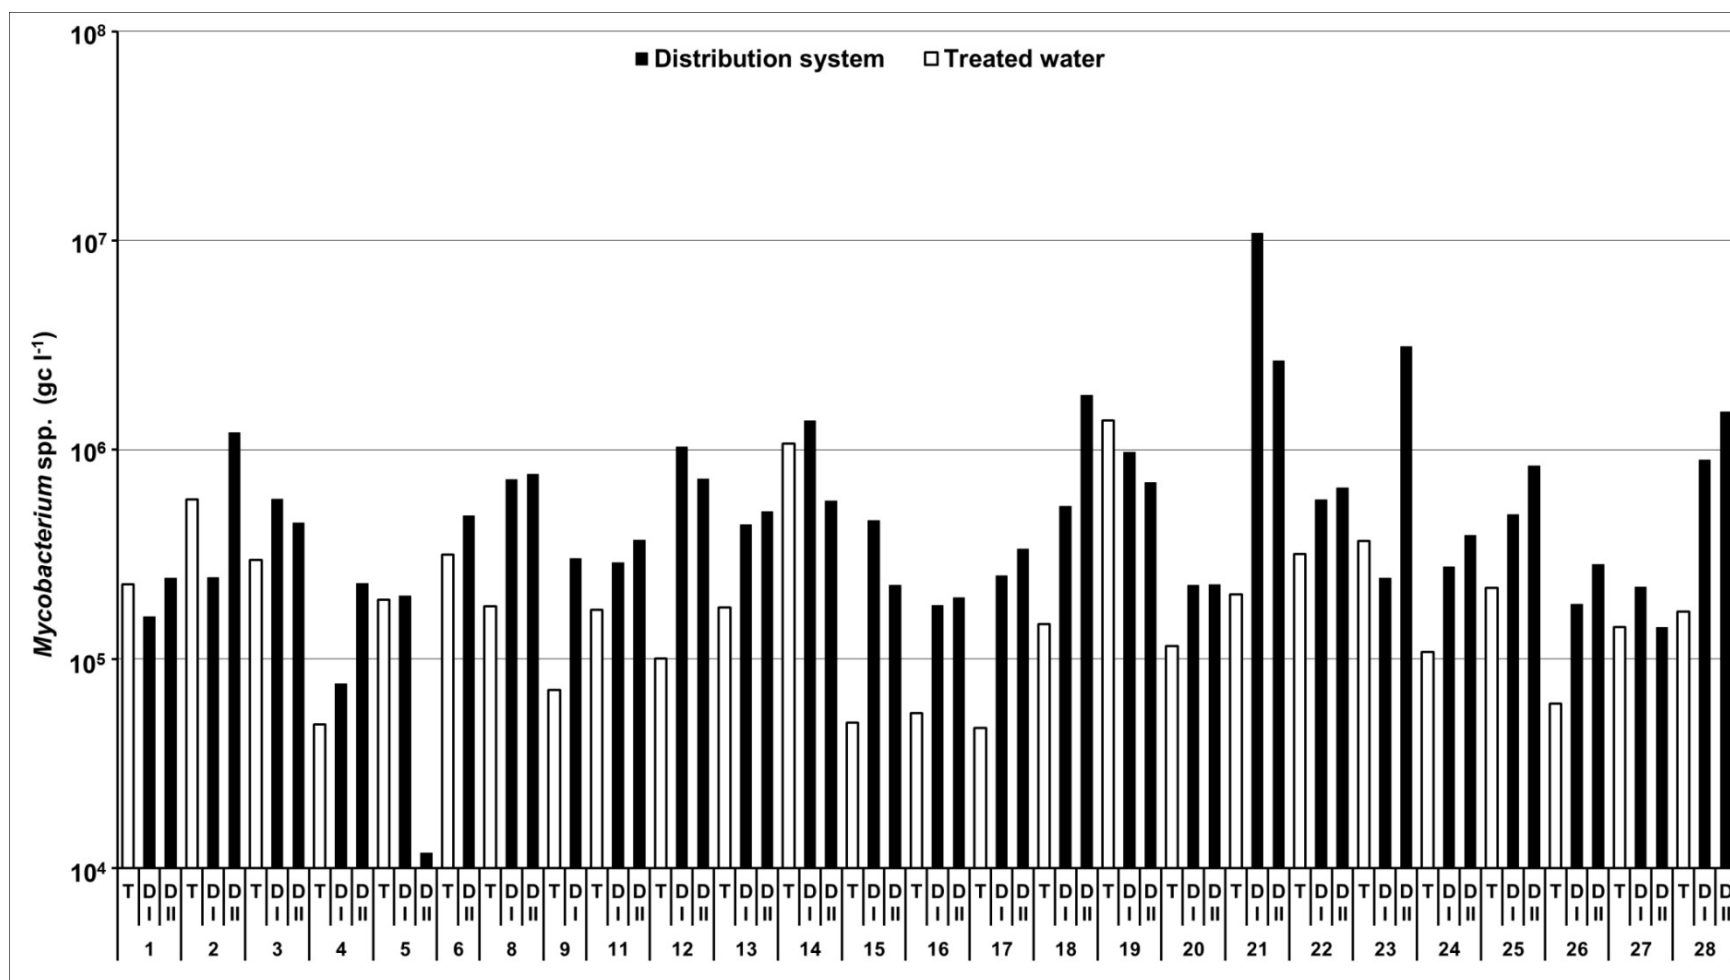

**Figure S8** 16S rRNA gene copy numbers (gc) of *Mycobacterium* spp. in treated water and in drinking water samples at two locations in the distribution system of 28 treatment plants in the Netherlands that produce unchlorinated drinking water from groundwater. T, treated water; DI, water from location I in distribution system; DII, water from location II in distribution system.

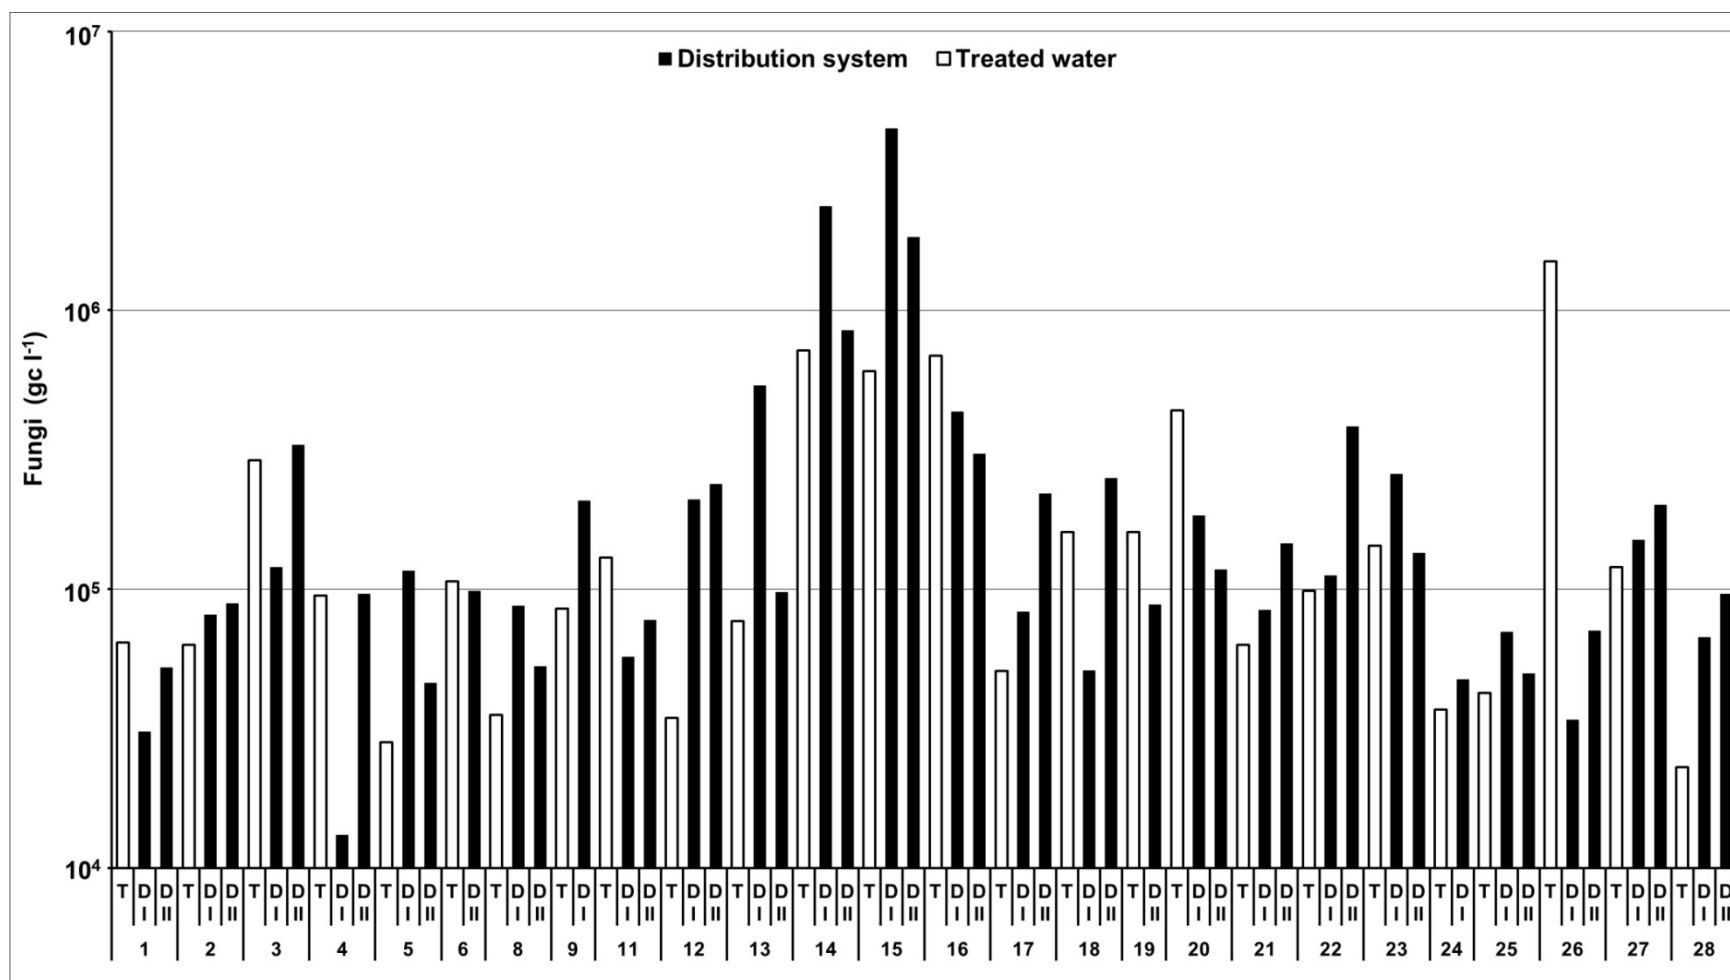

**Figure S9** 18S rRNA gene copy numbers (gc) of fungi in treated water and in drinking water samples at two locations in the distribution system of 28 treatment plants in the Netherlands that produce unchlorinated drinking water from groundwater. T, treated water; DI, water from location I in distribution system; DII, water from location II in distribution system.
